# Supplementary material
Source: PubMed Central journal article supplement (PMC4530022)

1 **Insulin resistance, metabolic syndrome, and lung function in U.S. adolescents with and without**  
2 **asthma.**

3 **Online Supplement**

4

5 Erick Forno, MD, MPH<sup>1\*</sup>, Yueh-Ying Han, PhD<sup>1\*</sup>, Radhika H Muzumdar, MD<sup>2</sup>, Juan C Celedón, MD  
6 DrPH<sup>1</sup>

7

8 <sup>1</sup>Division of Pediatric Pulmonary Medicine, Allergy, and Immunology; and <sup>2</sup>Division of Pediatric  
9 Endocrinology, Children's Hospital of Pittsburgh of UPMC, University of Pittsburgh School of  
10 Medicine, Pittsburgh, PA.

11 \*These authors contributed equally to this manuscript.

12

13 Corresponding author: Erick Forno, MD, MPH

14 Division of Pulmonary Medicine, Allergy and Immunology

15 Children's Hospital of Pittsburgh of UPMC

16 4401 Penn Avenue, Pittsburgh, PA 15224

17 Phone: 412.692.8429; Fax: 412.692.7636

18 Email: erick.forno@chp.edu

19

20 **Supplemental Table 1 – Characteristics of study participants by “ever asthma” status**

| Characteristics                       | No asthma<br>N=1334 | Ever asthma<br>N=315 | P-value |
|---------------------------------------|---------------------|----------------------|---------|
| Age (year)                            | 14.54 ± 0.05        | 14.82 ± 0.12         | 0.031   |
| Male gender                           | 688 (50.03)         | 177 (53.95)          | 0.231   |
| Race/ethnicity                        |                     |                      |         |
| Non-Hispanic White                    | 439 (60.51)         | 106 (61.68)          |         |
| Non-Hispanic Black                    | 294 (13.34)         | 90 (16.07)           | 0.044   |
| Hispanic                              | 530 (19.55)         | 98 (14.79)           |         |
| Other                                 | 71 (6.61)           | 21 (7.47)            |         |
| Household income < \$20,000/year      | 247 (13.81)         | 62 (13.75)           | 0.983   |
| Health insurance coverage             | 1125 (88.45)        | 285 (94.01)          | 0.013   |
| Family history of asthma              | 314 (22.42)         | 176 (51.99)          | <0.001  |
| ETS exposure                          | 203 (15.04)         | 59 (20.48)           | 0.058   |
| Hay fever                             | 115 (10.02)         | 65 (21.90)           | 0.001   |
| FEV <sub>1</sub> (L) <sup>1</sup>     | 3.40 ± 0.03         | 3.43 ± 0.05          | 0.003   |
| FVC (L) <sup>1</sup>                  | 3.93 ± 0.03         | 4.11 ± 0.05          | 0.561   |
| FEV <sub>1</sub> /FVC (%)             | 86.82 ± 0.22        | 83.52 ± 0.53         | <0.001  |
| C-reactive Protein                    | 0.14 ± 0.02         | 0.11 ± 0.01          | 0.225   |
| Body mass index (BMI) z-score         | 0.65 ± 0.04         | 0.79 ± 0.08          | 0.101   |
| Percent body fat (PBF) z-score        | 0.24 ± 0.04         | 0.39 ± 0.06          | 0.046   |
| Waist circumference (WC) z-score      | -0.07 ± 0.04        | 0.09 ± 0.07          | 0.055   |
| Waist-to-Height ratio (WHR) z-score   | -0.11 ± 0.04        | 0.01 ± 0.07          | 0.145   |
| Glucose-to-insulin ratio <sup>2</sup> | 9.51 ± 0.38         | 8.19 ± 0.39          | 0.018   |
| QUICKI <sup>2</sup>                   | 0.33 ± 0.002        | 0.32 ± 0.002         | 0.032   |
| HOMA-IR <sup>2</sup>                  | 3.24 ± 0.11         | 3.49 ± 0.22          | 0.276   |
| Metabolic syndrome <sup>2</sup>       | 58 (9.02)           | 14 (9.34)            | 0.920   |

- 21 Mean (SE) for continuous and N (%) for binary variables. Number may vary due to missingness. ETS =  
22 Environmental tobacco smoking. QUICKI = quantitative insulin-sensitivity check index. HOMA-  
23 IR=homeostasis model assessment - insulin resistance. <sup>1</sup>Adjusted for age, gender, height, and height<sup>2</sup>.  
24 <sup>2</sup>Data analyzed only for children who were examined fasting, in morning sessions (n=701).

25 **Supplemental Table 2 – Insulin sensitivity/resistance, metabolic syndrome, and lung function by adiposity status**

|                                                    | Glucose-to-insulin ratio | QUICKI <sup>1</sup>     | HOMA-IR                   | Metabolic syndrome        |
|----------------------------------------------------|--------------------------|-------------------------|---------------------------|---------------------------|
| <b>PBF &lt; 85<sup>th</sup> percentile (n=391)</b> |                          |                         |                           |                           |
| FEV <sub>1</sub> (ml)                              | -2.10 (-13.37, 9.17)     | -7.38 (-31.51, 16.73)   | 8.90 (-26.04, 43.84)      | -198.72 (-460.68, 63.24)  |
| FVC (ml)                                           | -1.61 (-10.94, 7.71)     | -3.13 (-24.67, 18.41)   | 0.67 (-37.94, 39.28)      | -71.52 (-371.52, 228.49)  |
| FEV <sub>1</sub> /FVC (%)                          | -0.01 (-0.17, 0.15)      | -0.13 (-0.45, 0.20)     | 0.22 (-0.25, 0.69)        | -3.89 (-6.23, -1.55)**    |
| <b>PBF ≥ 85<sup>th</sup> percentile (n=118)</b>    |                          |                         |                           |                           |
| FEV <sub>1</sub> (ml)                              | 31.80 (1.16, 62.43)*     | 35.73 (0.18, 71.29)*    | -25.41 (-51.95, 1.13)     | 233.96 (56.41, 411.51)*   |
| FVC (ml)                                           | 36.47 (14.70, 58.24)**   | 44.40 (13.35, 75.45)**  | -28.97 (-54.44, -3.50)*   | 395.01 (178.97, 611.06)** |
| FEV <sub>1</sub> /FVC (%)                          | 0.09 (-0.41, 0.60)       | 0.06 (-0.46, 0.58)      | -0.09 (-0.42, 0.24)       | -2.09 (-4.00, -0.18)*     |
| <b>WC &lt; 85<sup>th</sup> percentile (n=457)</b>  |                          |                         |                           |                           |
| FEV <sub>1</sub> (ml) <sup>2</sup>                 | -0.13 (-9.50, 9.76)      | -1.10 (-20.64, 18.45)   | -6.53 (-26.12, 13.05)     | -7.25 (-262.39, 247.88)   |
| FVC (ml) <sup>2</sup>                              | -0.11 (-8.25, 8.03)      | 1.58 (-15.87, 19.03)    | -9.47 (-29.57, 10.62)     | 172.89 (-160.77, 506.55)  |
| FEV <sub>1</sub> /FVC (%)                          | 0.01 (-0.14, 0.16)       | -0.06 (-0.35, 0.24)     | 0.01 (-0.33, 0.35)        | -4.30 (-6.47, -2.13)**    |
| <b>WC ≥ 85<sup>th</sup> percentile (n=84)</b>      |                          |                         |                           |                           |
| FEV <sub>1</sub> (ml)                              | 40.66 (-6.77, 88.09)     | 57.00 (2.66, 111.33)*   | -22.76 (-49.18, 3.66)     | 298.01 (234.24, 361.78)** |
| FVC (ml)                                           | 68.26 (-1.29, 137.80)    | 87.71 (6.80, 162.63)*   | -34.56 (-70.01, 0.90)     | 394.86 (364.19, 425.56)** |
| FEV <sub>1</sub> /FVC (%)                          | -0.22 (-0.81, 0.38)      | -0.12 (-0.67, 0.44)     | 0.06 (-0.23, 0.34)        | -0.30 (-0.95, 0.34)       |
| <b>WHR &lt; 85<sup>th</sup> percentile (n=453)</b> |                          |                         |                           |                           |
| FEV <sub>1</sub> (ml) <sup>2</sup>                 | 0.73 (-9.34, 10.80)      | 0.40 (-20.02, 20.83)    | -8.85 (-30.68, 12.99)     | -168.44 (-410.03, 73.15)  |
| FVC (ml) <sup>2</sup>                              | 0.23 (-8.37, 8.83)       | 2.09 (-15.73, 19.91)    | -9.18 (-30.80, 12.44)     | -13.53 (-289.49, 262.43)  |
| FEV <sub>1</sub> /FVC (%)                          | 0.02 (-0.13, 0.16)       | -0.04 (-0.32, 0.24)     | -0.04 (-0.37, 0.29)       | -4.28 (-6.28, -2.29)**    |
| <b>WHR ≥ 85<sup>th</sup> percentile (n=88)</b>     |                          |                         |                           |                           |
| FEV <sub>1</sub> (ml)                              | 59.56 (38.21, 80.90)**   | 79.56 (55.23, 103.89)** | -37.16 (-57.56, -16.76)** | 229.16 (181.16, 277.16)** |
| FVC (ml)                                           | 65.33 (19.72, 110.94)**  | 92.08 (43.92, 140.23)** | -47.35 (-75.12, -19.58)** | 383.34 (357.78, 408.90)** |
| FEV <sub>1</sub> /FVC (%)                          | 0.15 (-0.56, 0.83)       | 0.15 (-0.64, 0.93)      | 0.01 (-0.37, 0.38)        | -2.01 (-2.49, -1.53)**    |

26 Data presented as beta (95% CI). All models adjusted for age, gender, race/ethnicity, health insurance coverage, family history of asthma,  
 27 ETS exposure, fasting hours, C-reactive protein, and current asthma. FEV<sub>1</sub> and FVC additionally adjusted for height and height<sup>2</sup>. \*p<0.05,  
 28 \*\*p<0.01. <sup>1</sup>Results shown per 0.01 unit of QUICKI increment in each lung function measure.

29 **Supplemental Table 3 – Metabolic syndrome criteria and lung function by asthma and obesity status**

|                                   | <b>SBP ≥ 90<sup>th</sup><br/>percentile</b> | <b>HDL<br/>&lt; 50 mg/dL</b>   | <b>Triglyceride<br/>≥ 100 mg/dL</b> | <b>WC ≥ 75<sup>th</sup><br/>percentile</b> | <b>Fasting glucose<br/>≥ 110 mg/dL</b> |
|-----------------------------------|---------------------------------------------|--------------------------------|-------------------------------------|--------------------------------------------|----------------------------------------|
| <b><u>FEV<sub>1</sub>/FVC</u></b> |                                             |                                |                                     |                                            |                                        |
| All participants <sup>1</sup>     | -0.38 (-2.15, 1.40)                         | -0.65 (-2.08, 0.78)            | -0.40 (-2.46, 1.66)                 | -1.65 (-3.37, 0.08)                        | -1.68 (-6.26, 2.90)                    |
| -Non-asthmatics                   | 0.14 (-1.72, 2.01)                          | -0.63 (-2.14, 0.88)            | -0.34 (-2.48, 1.80)                 | <b>-1.94 (-3.79, -0.10)*</b>               | -1.70 (-6.33, 2.93)                    |
| Asthmatics                        | <b>-12.73 (-16.97, -8.50)**</b>             | 1.61 (-1.25, 4.47)             | 0.46 (-0.87, 1.80)                  | <b>2.82 (1.06, 4.57)**</b>                 | n/a <sup>2</sup>                       |
| Normal weight <sup>1</sup>        | -0.53 (-3.08, 2.03)                         | 0.33 (-1.73, 2.39)             | -0.51 (-3.45, 2.44)                 | n/a <sup>2</sup>                           | -2.85 (-8.79, 3.08)                    |
| Overweight/obese <sup>1</sup>     | -0.12 (-2.64, 2.39)                         | <b>-1.93 (-3.66, -0.20)*</b>   | -0.20 (-2.10, 1.69)                 | -1.54 (-3.21, 0.23)                        | 2.07 (-1.32, 5.45)                     |
| <b><u>FEV<sub>1</sub></u></b>     |                                             |                                |                                     |                                            |                                        |
| All participants <sup>1</sup>     | -83.48 (-187.63, 20.68)                     | 92.85 (-1.31, 187.00)          | 0.83 (-100.50, 102.15)              | 71.40 (-38.99, 181.78)                     | 5.63 (-232.87, 244.13)                 |
| Non-asthmatics                    | -101.58 (-215.95, 12.78)                    | 84.44 (-14.10, 182.97)         | 22.96 (-74.20, 120.12)              | 82.32 (-32.58, 197.23)                     | 10.55 (-229.17, 250.27)                |
| Asthmatics                        | <b>-322.97 (-379.37, -266.57)**</b>         | 151.86 (-52.38, 356.10)        | <b>-450.61 (-523.61, -377.60)**</b> | -71.00 (-206.91, 64.91)                    | n/a <sup>2</sup>                       |
| Normal weight <sup>1</sup>        | -50.01 (-153.81, 53.79)                     | <b>150.53 (29.68, 271.38)*</b> | -83.93 (-282.56, 114.70)            | n/a <sup>2</sup>                           | 160.96 (177.48, 499.40)                |
| Overweight/obese <sup>1</sup>     | -77.84 (-205.30, 49.62)                     | -75.34 (-213.64, 62.96)        | 144.75 (-52.07, 341.57)             | <b>-200.70 (-372.33, -29.06)*</b>          | -114.66 (-510.55, 281.23)              |
| <b><u>FVC</u></b>                 |                                             |                                |                                     |                                            |                                        |
| All participants <sup>1</sup>     | -71.49 (-201.82, 58.83)                     | <b>121.29 (10.49, 232.10)*</b> | 17.19 (-125.09, 159.47)             | <b>170.55 (40.73, 300.37)*</b>             | 108.71 (-317.35, 534.77)               |
| Non-asthmatics                    | <b>-125.14 (-247.89, -2.39)*</b>            | 107.12 (-9.88, 224.13)         | 43.34 (-93.04, 179.71)              | <b>202.11 (70.56, 333.65)**</b>            | 114.76 (-323.20, 552.71)               |
| Asthmatics                        | <b>282.05 (123.76, 440.33)**</b>            | <b>143.10 (47.3, 238.87)**</b> | <b>-474.65 (-527.09, -422.21)**</b> | <b>-101.12 (-163.14, -39.10)**</b>         | n/a <sup>2</sup>                       |
| Normal weight <sup>1</sup>        | -25.97 (-156.59, 104.65)                    | 132.25 (1.80, 262.70)          | -84.30 (-292.06, 123.45)            | n/a <sup>2</sup>                           | 353.91 (-236.31, 944.14)               |
| Overweight/obese <sup>1</sup>     | -62.04 (-291.97, 167.89)                    | -10.92 (-131.2, 109.35)        | 189.72 (-40.84, 420.28)             | -160.19 (-337.84, 17.45)                   | -219.07 (-624.66, 186.53)              |

30

31 Data presented as  $\beta$  (95% CI). All models adjusted for age, gender, race/ethnicity, health insurance coverage, family history of asthma, ETS

32 exposure, fasting hours, and CRP. <sup>1</sup>Defined on basis of BMI z-score; additionally adjusted for current asthma. <sup>2</sup>All asthmatics had fasting

33 glucose < 110mg/dL, and all children of normal weight had WC < 75<sup>th</sup> pct. \*p<0.05, \*\*p<0.01.

34 **Supplemental Table 4 – Insulin sensitivity/resistance, metabolic syndrome, and percent-of-predicted FEV<sub>1</sub>, FVC and FEV<sub>1</sub>/FVC by**  
 35 **asthma status among white, black and Mexican American participants**

| <b>Outcome</b>                              | <b>Glucose:insulin ratio</b> | <b>QUICKI<sup>1</sup></b>   | <b>HOMA-IR</b>                 | <b>Metabolic syndrome</b>     |
|---------------------------------------------|------------------------------|-----------------------------|--------------------------------|-------------------------------|
| <b>All Participants<sup>2</sup> (n=446)</b> |                              |                             |                                |                               |
| FEV <sub>1</sub> (%pred <sup>3</sup> )      | <b>3.11 (0.90, 5.33)**</b>   | <b>7.56 (2.67, 12.45)**</b> | <b>-9.45 (-14.59, -4.31)**</b> | -27.38 (-77.86, 23.10)        |
| FVC (%pred <sup>3</sup> )                   | <b>2.75 (0.73, 4.76)**</b>   | <b>7.84 (3.80, 11.87)**</b> | <b>-9.16 (-13.36, -4.96)**</b> | 7.66 (-41.41, 56.74)          |
| FEV <sub>1</sub> /FVC (%pred <sup>3</sup> ) | <0.001 (-0.002, 0.002)       | -0.03 (-0.36, 0.30)         | <-0.001 (-0.003, 0.003)        | <b>-0.02 (-0.05, -0.002)*</b> |
| <b>No asthma (n=421)</b>                    |                              |                             |                                |                               |
| FEV <sub>1</sub> (%pred <sup>3</sup> )      | <b>3.06 (0.78, 5.34)*</b>    | <b>7.37 (2.25, 12.48)**</b> | <b>-9.18 (-14.66, -3.70)**</b> | -26.50 (-75.79, 22.79)        |
| FVC (%pred <sup>3</sup> )                   | <b>2.64 (0.58, 4.69)*</b>    | <b>7.54 (3.35, 11.74)**</b> | <b>-8.83 (-13.35, -4.32)**</b> | 3.73 (43.85, 51.32)           |
| FEV <sub>1</sub> /FVC (%pred <sup>3</sup> ) | <0.001 (-0.002, 0.002)       | -0.02 (-0.35, 0.31)         | <-0.001 (-0.003, 0.003)        | -0.02 (-0.04, 0.005)          |
| <b>Current asthma (n=25)</b>                |                              |                             |                                |                               |
| FEV <sub>1</sub> (%pred <sup>3</sup> )      | -5.33 (-12.78, 2.12)         | -8.54 (-36.29, 19.20)       | 8.12 (-21.61, 37.86)           | 7.14 (-664.54, 678.82)        |
| FVC (%pred <sup>3</sup> )                   | 1.06 (-26.19, 28.31)         | 4.17 (-56.56, 64.89)        | 0.48 (-50.10, 58.07)           | 106.24 (-372.10, 584.59)      |
| FEV <sub>1</sub> /FVC (%pred <sup>3</sup> ) | -0.01 (-0.04, 0.03)          | -1.16 (-4.40, 2.08)         | 0.008 (-0.01, 0.03)            | <b>-0.09 (-0.18, -0.03)*</b>  |

36  
 37 Data presented as beta coefficient (95% CI). All models adjusted for age, gender, family history of asthma, ETS exposure, fasting hours, C-reactive  
 38 protein, and BMI z-score. §p<0.1; \*p<0.05, \*\*p<0.01. <sup>1</sup>Results shown per 0.01 unit of QUICKI increment in each lung function measure.  
 39 <sup>2</sup>Additionally adjusted for asthma status. <sup>3</sup>Percent-of-predicted based on NHANES III equations.

40 **Supplemental Table 5 – Insulin sensitivity/resistance, metabolic syndrome, and percent-of-predicted FEV<sub>1</sub>, FVC and FEV<sub>1</sub>/FVC by**  
 41 **obesity status among white, black and Mexican American participants**

| Outcome                                            | Glucose:insulin ratio       | QUICKI <sup>1</sup>          | HOMA-IR                       | Metabolic syndrome            |
|----------------------------------------------------|-----------------------------|------------------------------|-------------------------------|-------------------------------|
| <b>BMI &lt; 85<sup>th</sup> percentile (n=257)</b> |                             |                              |                               |                               |
| FEV <sub>1</sub> (%pred <sup>2</sup> )             | 0.33 (-1.90, 2.55)          | 0.34 (-5.05, 5.73)           | -1.40 (-12.36, 9.56)          | 12.21 (-51.87, 76.29)         |
| FVC (%pred <sup>2</sup> )                          | -0.40 (-1.82, 1.02)         | -0.30 (-3.95, 3.55)          | -1.39 (-8.37, 5.59)           | 28.23 (-13.44, 73.91)         |
| FEV <sub>1</sub> /FVC (%pred <sup>2</sup> )        | 0.001 (-0.001, 0.003)       | <0.001 (-0.004, 0.004)       | -0.001 (-0.007, 0.006)        | -0.01 (-0.07, 0.04)           |
| <b>BMI ≥ 85<sup>th</sup> percentile (n=191)</b>    |                             |                              |                               |                               |
| FEV <sub>1</sub> (%pred <sup>2</sup> )             | <b>6.73 (2.23, 11.24)**</b> | <b>10.95 (4.85, 17.05)**</b> | <b>-7.84 (-11.69, 3.99)**</b> | 0.78 (-55.43, 56.99)          |
| FVC (%pred <sup>2</sup> )                          | <b>5.71 (3.18, 8.25)**</b>  | <b>9.08 (6.02, 12.14)**</b>  | <b>-5.79 (-7.44, -4.13)**</b> | 37.19 (-15.87, 90.25)         |
| FEV <sub>1</sub> /FVC (%pred <sup>2</sup> )        | <0.001 (-0.002, 0.004)      | 0.002 (-0.002, 0.006)        | -0.002 (-0.005, 0.001)        | <b>-0.03 (-0.05, -0.004)*</b> |

42  
 43 Data presented as beta (95% CI). All models adjusted for age, gender, family history of asthma, ETS exposure, fasting hours, C-reactive protein,  
 44 and asthma status. \*p<0.05, \*\*p<0.01. <sup>1</sup>Results shown per 0.01 unit of QUICKI increment in each lung function measure. <sup>2</sup>Percent-of predicted based  
 45 on NHANES III equations.

46 **Supplemental Table 6 – Metabolic syndrome criteria and percent-of-predicted FEV<sub>1</sub>/FVC by asthma and obesity status among white,**  
 47 **black, and Mexican-American participants**

|                               | <b>SBP ≥ 90<sup>th</sup><br/>percentile</b> | <b>HDL<br/>&lt; 50 mg/dL</b> | <b>Triglyceride<br/>≥ 100 mg/dL</b> | <b>WC ≥ 75<sup>th</sup><br/>percentile</b> | <b>Fasting glucose ≥<br/>110 mg/dL</b> |
|-------------------------------|---------------------------------------------|------------------------------|-------------------------------------|--------------------------------------------|----------------------------------------|
| All participants <sup>1</sup> | 0.001 (-0.02, 0.02)                         | -0.002 (-0.02, 0.01)         | -0.01 (-0.02, 0.01)                 | <b>-0.02 (-0.03, -0.01)**</b>              | -0.02 (-0.07, 0.03)                    |
| Non-asthmatics                | 0.01 (-0.01, 0.03)                          | -0.002 (-0.02, 0.01)         | -0.004 (-0.02, 0.01)                | <b>-0.02 (-0.04, -0.01)**</b>              | -0.02 (-0.07, 0.03)                    |
| Asthmatics                    | <b>-0.16 (-0.28, -0.05)**</b>               | 0.06 (-0.05, 0.17)           | 0.03 (-0.28, 0.33)                  | <b>0.01 (0.001, 0.03)*</b>                 | n/a <sup>2</sup>                       |
| Normal weight <sup>1</sup>    | -0.002 (-0.02, 0.02)                        | 0.01 (-0.01, 0.04)           | -0.01 (-0.03, 0.01)                 | n/a <sup>2</sup>                           | -0.03 (-0.10, 0.03)                    |
| Overweight/obese <sup>1</sup> | 0.001 (-0.02, 0.04)                         | -0.02 (-0.04, 0.002)         | 0.003 (-0.01, 0.02)                 | <b>-0.02 (-0.04, -0.01)**</b>              | 0.01 (-0.02, 0.04)                     |

48  
 49 FEV<sub>1</sub>/FVC as percent-of predicted based on NHANES III equations. Data presented as β (95% CI). All models adjusted for age, gender,  
 50 family history of asthma, ETS exposure, fasting hours, and CRP. <sup>1</sup>Defined on basis of BMI z-score; additionally adjusted for current asthma.  
 51 <sup>2</sup>All asthmatics had fasting glucose < 110mg/dL, and all children of normal weight had WC < 75<sup>th</sup> pct. \*p<0.05, \*\*p<0.01.

52 **SUPPLEMENTAL FIGURE LEGENDS**

53

54 **Supplemental Figure 1** – Derivation of study sample from NHANES 2007-2008 and 2009-2010

55 NHANES: National Health and Nutrition Examination Survey.

56

57 **Supplemental Figure 2** – Predicted FEV<sub>1</sub> by asthma and metabolic syndrome status

58 All models adjusted for age, gender, race/ethnicity, health insurance coverage, family history of asthma,

59 ETS exposure, fasting hours, C-reactive protein, and z-score for each respective adiposity indicator

60 (BMI, PBF, WC, or WHR). MS=metabolic syndrome. No asthma & no MS n=496; MS only n=58;

61 asthma only n=23; and MS & asthma n=7. \*P<0.05 compared to control group (no asthma & no MS).

62



**Supplemental Figure 1 – Derivation of study sample from NHANES 2007-2008 and 2009-2010**

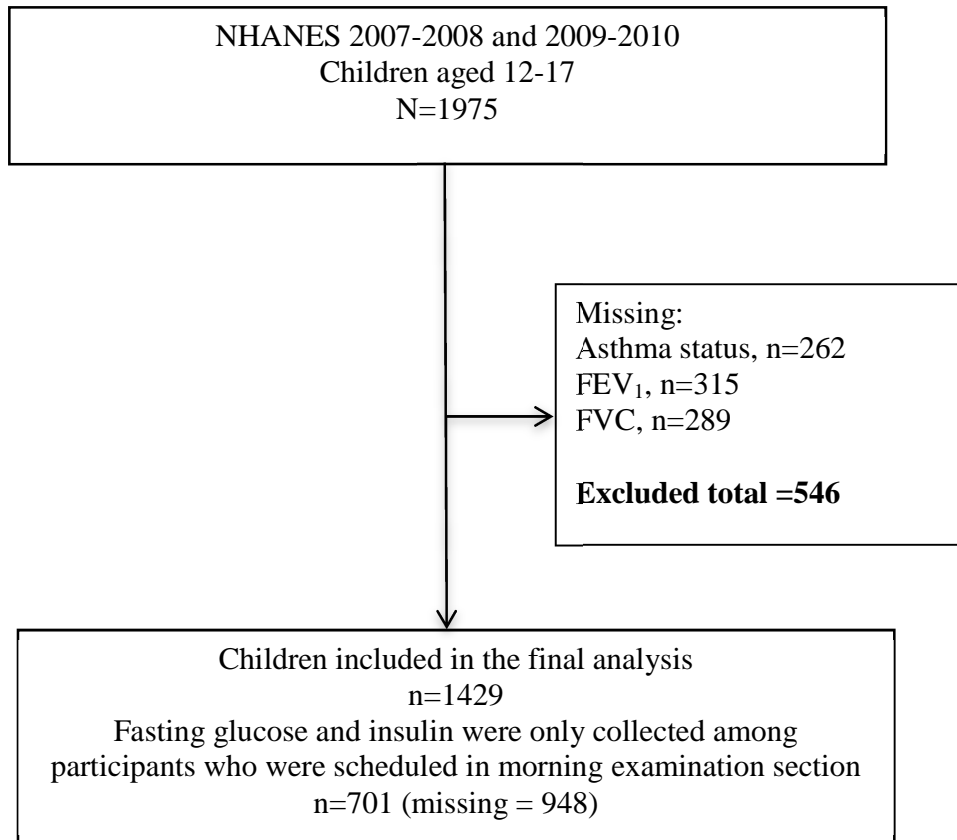

**Supplemental Figure 2 – Predicted FEV<sub>1</sub> by asthma and metabolic syndrome status**

**a. Body mass index (BMI)**

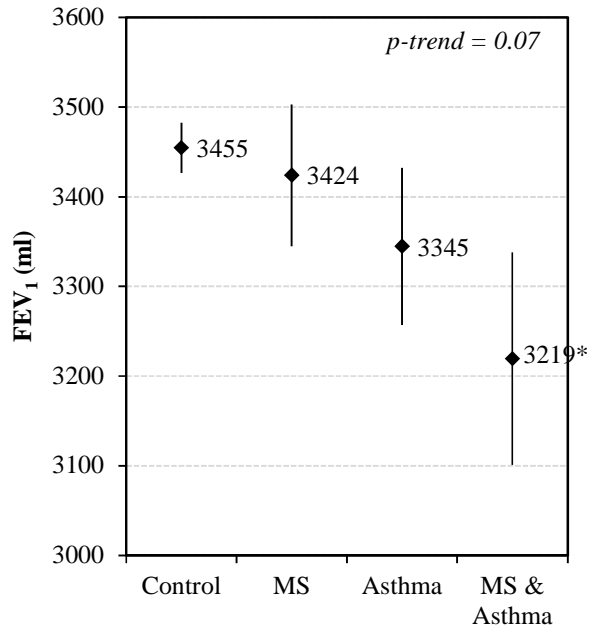

**b. Percent body fat (PBF)**

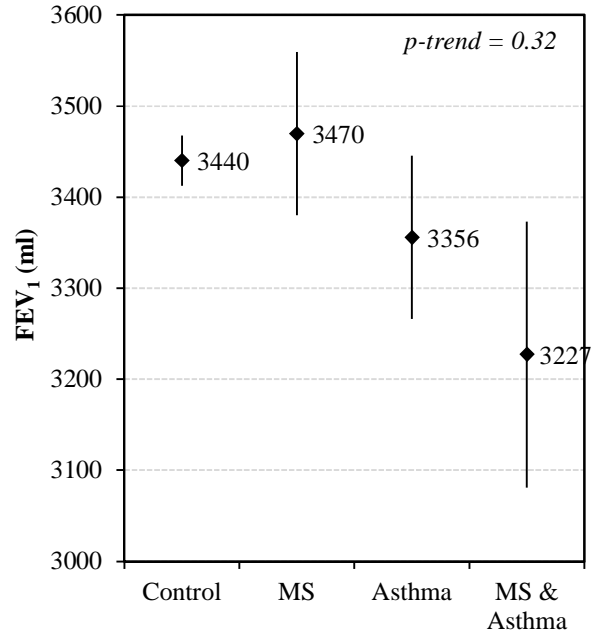

**c. Waist circumference (WC)**

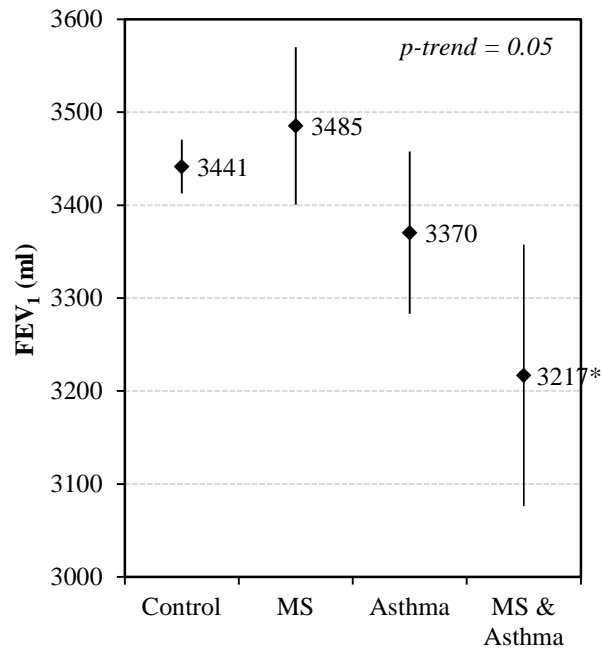

**d. Waist to height ratio (WHR)**

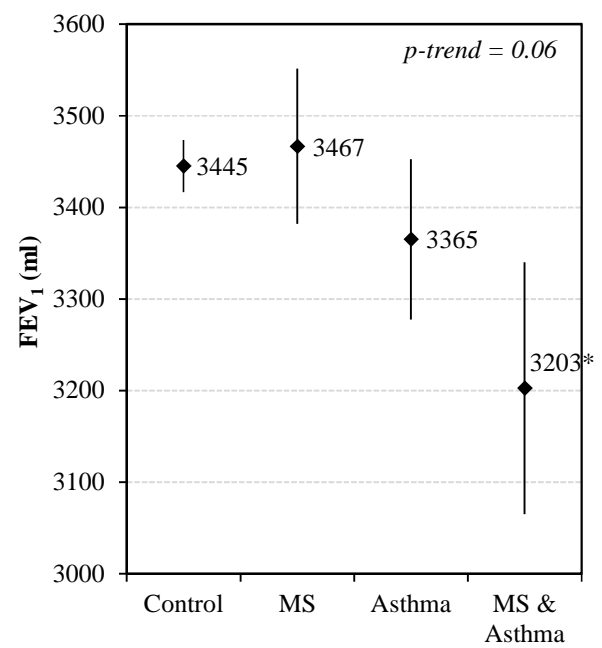

Supplement: NIHMS669432-supplement-supplement_1.pdf [file NIHMS669432-supplement-supplement_1.pdf]
